# Supplementary material
Source: Springer Nature journal article supplement (https://www.springermedizin.de/resource/supplementary/13047_2013_596_MOESM3_ESM.pdf/9664174)
Supplement: MOESM3 [file 9664174]

### Part 1 Concurrent Validity

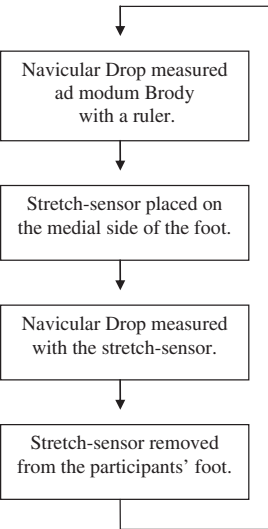

Repeated by the next rater

### Part 2 Reliability

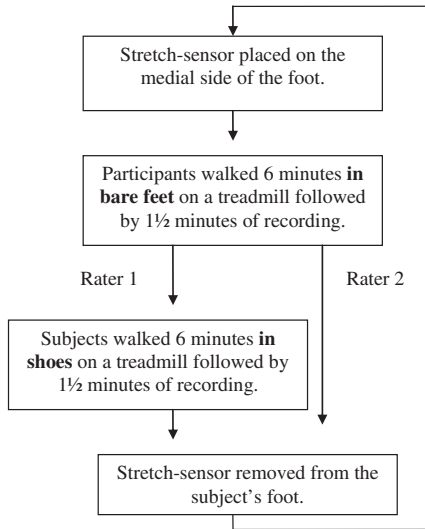

Repeated by the next rater
